# Supplementary material for: Reaction mechanisms in ionic liquids: the kinetics and mechanism of the reaction of O,O-diethyl (2,4-dinitrophenyl) phosphate triester with secondary alicyclic amines
Source: Royal Society of Chemistry journal article supplement (doi:10.1039/c5ob02128f), 2015-12-09
Supplement: c5ob02128f1.pdf [file c5ob02128f1.pdf]

**Reaction mechanisms in Ionic Liquids: Kinetics and  
mechanism of the reaction of *O*, *O*-diethyl *O*-(2,4-  
dinitrophenyl) phosphate triester with secondary alicyclic  
amines**

Paulina Pavez\*, Daniela Millán, Javiera Morales, Mabel Rojas, Daniel Céspedes,

José G. Santos.

Facultad de Química. Pontificia Universidad Católica de Chile. Casilla 306, Santiago 6094411,  
Chile.

Author Information

\*Corresponding authors. Tel.: +56-02-23541743; fax: +56-02-26864744; e-mail: ppavezg@uc.cl

Present address: Facultad de Química, Pontificia Universidad Católica de Chile, Av. Vicuña  
Mackenna 4860, Santiago 6094411, Chile.

### Electronic supplementary information

| Table of contents                                                                                                                                                                                                                                                                                                                          |     |
|--------------------------------------------------------------------------------------------------------------------------------------------------------------------------------------------------------------------------------------------------------------------------------------------------------------------------------------------|-----|
| <b>Table S1:</b> Pseudo-first-order rate constants ( $k_{\text{obsd}}$ ) for the reaction of <b>1</b> with the secondary alicyclic amines in [Bmim]BF <sub>4</sub> at 25°C.                                                                                                                                                                | S2  |
| <b>Table S2:</b> Pseudo-first-order rate constants ( $k_{\text{obsd}}$ ) for the reaction of <b>1</b> with the secondary alicyclic amines in [Bmim]DCA at 25°C.                                                                                                                                                                            | S3  |
| <b>Table S3:</b> Pseudo-first-order rate constant ( $k_{\text{obsd}}$ ), second-order rate constant ( $k_N^T$ ), rate constant for nucleophilic attack at P ( $k_N^P$ ) and rate constant for nucleophilic attack at aromatic C-1 ( $k_N^{Ar}$ ) for the reaction of piperidine to <b>1</b> in [Bmim]BF <sub>4</sub> at the 20-40°C range. | S4  |
| <b>Table S4:</b> Pseudo-first-order rate constant ( $k_{\text{obsd}}$ ), second-order rate constant ( $k_N^T$ ), rate constant for nucleophilic attack at P ( $k_N^P$ ) for the reaction of piperidine to <b>1</b> in [Bmim]DCA at the 20-40°C range.                                                                                      | S5  |
| <b>Table S5:</b> Pseudo-first-order rate constant ( $k_{\text{obsd}}$ ), second-order rate constant ( $k_N^T$ ), rate constant for nucleophilic attack at P ( $k_N^P$ ) and rate constant for nucleophilic attack at aromatic C-1 ( $k_N^{Ar}$ ) for the reaction of piperidine to <b>1</b> in aqueous solution at the 20-40°C range.      | S6  |
| <b>Figure S1:</b> <sup>31</sup> P-NMR spectrum for the reaction of <b>1</b> with the secondary alicyclic amines in [Bmim]BF <sub>4</sub> at the 25°C                                                                                                                                                                                       | S7  |
| <b>Figure S2:</b> Plots $k_{\text{obsd}}^P$ against SA amine concentration for the reaction of <b>1</b> with a) piperidine, b) morpholine and c) 1-(2-hydroxyethyl)piperazine in [Bmim]BF <sub>4</sub> at the 25°C.                                                                                                                        | S8  |
| <b>Figure S3:</b> Plots $k_{\text{obsd}}^P$ against amine concentration for the reaction of <b>1</b> with a) piperidine, b) 1-(2-hydroxyethyl)piperazine and c) Morpholine in [Bmim]DCA at the 25°C.                                                                                                                                       | S9  |
| <b>Figure S4:</b> Linear plot of $k_{\text{obsd}}$ vs. [Formylpiperazine] <sup>2</sup> in a)[Bmim]BF <sub>4</sub> b) [Bmim]DCA.                                                                                                                                                                                                            | S10 |
| <b>Figure S5:</b> Double pK <sub>a</sub> plot between pK <sub>a</sub> values of SA amines in [Bmim]BF <sub>4</sub> and Water                                                                                                                                                                                                               | S10 |
| <b>Figure S6:</b> Arrhenius and Eyring plots for the reaction of <b>1</b> with piperidine in [Bmim]DCA.                                                                                                                                                                                                                                    | S11 |
| <b>Figure S7:</b> Arrhenius and Eyring plots for the reaction of <b>1</b> with piperidine in [Bmim]BF <sub>4</sub>                                                                                                                                                                                                                         | S11 |
| <b>Figure S8:</b> Arrhenius and Eyring plots for the reaction of <b>1</b> with piperidine in 44% w/w ethanol-water.                                                                                                                                                                                                                        | S12 |
| <b>Figure S9:</b> <sup>31</sup> P-NMR spectrum for the reaction of <b>1</b> with piperidine in [Bmim]BF <sub>4</sub> at the 20-40°C range.                                                                                                                                                                                                 | S12 |
| <b>Kinetic Details.</b>                                                                                                                                                                                                                                                                                                                    | S13 |

**Table S1:** Pseudo-first-order rate constants ( $k_{\text{obsd}}$ ) for the reaction of **1** with the secondary alicyclic amines in [Bmim]BF<sub>4</sub> at 25°C±0.1.

| <b>Piperidine</b>                    |                                     | <b>Morpholine</b>             |                                     |
|--------------------------------------|-------------------------------------|-------------------------------|-------------------------------------|
| $10^3[\text{Amine}]/\text{M}$        | $10^3k_{\text{obsd}}/\text{s}^{-1}$ | $10^3[\text{Amine}]/\text{M}$ | $10^3k_{\text{obsd}}/\text{s}^{-1}$ |
| 4.32                                 | 1.87                                | 8.69                          | 1.41                                |
| 5.62                                 | 7.79                                | 9.78                          | 1.87                                |
| 6.92                                 | 10.3                                | 10.9                          | 2.26                                |
| 9.51                                 | 20.9                                | 12.2                          | 2.59                                |
| 12.1                                 | 33.9                                | 13.9                          | 2.95                                |
| 14.7                                 | 48.2                                | 15.2                          | 3.59                                |
| 17.3                                 | 59.5                                | 17.4                          | 4.58                                |
| -                                    | -                                   | 19.6                          | 4.88                                |
| -                                    | -                                   | 21.7                          | 6.05                                |
| <b>1-(2-Hydroxyethyl)-piperazine</b> |                                     | <b>1-Formylpiperazine</b>     |                                     |
| $10^3[\text{Amine}]/\text{M}$        | $10^3k_{\text{obsd}}/\text{s}^{-1}$ | $10^3[\text{Amine}]/\text{M}$ | $10^3k_{\text{obsd}}/\text{s}^{-1}$ |
| 9.51                                 | 2.21                                | 1.31                          | 0.357                               |
| 12.1                                 | 4.49                                | 2.40                          | 0.830                               |
| 13.4                                 | 6.74                                | 3.48                          | 1.09                                |
| 14.7                                 | 7.71                                | 4.57                          | 3.26                                |
| 16.0                                 | 8.42                                | 5.65                          | 4.22                                |
| 17.3                                 | 10.5                                | 7.83                          | 10.2                                |
| -                                    | -                                   | 10.0                          | 13.4                                |
| -                                    | -                                   | 11.1                          | 18.2                                |
| -                                    | -                                   | 12.2                          | 23.5                                |
| -                                    | -                                   | 13.3                          | 25.4                                |
| -                                    | -                                   | 14.4                          | 30.6                                |

Pseudo first-order rate constants were reproducible within a  $\pm 5\%$

**Table S2:** Pseudo-first-order rate constants ( $k_{\text{obsd}}$ ) for the reaction of **1** with the secondary alicyclic amines in [Bmim]DCA at 25°C±0.1.

| <b>Piperidine</b>             |                                     | <b>1-(2-Hydroxyethyl)-<br/>piperazine</b> |                                     |
|-------------------------------|-------------------------------------|-------------------------------------------|-------------------------------------|
| $10^3[\text{Amine}]/\text{M}$ | $10^3k_{\text{obsd}}/\text{s}^{-1}$ | $10^3[\text{Amine}]/\text{M}$             | $10^3k_{\text{obsd}}/\text{s}^{-1}$ |
| 1.73                          | 0.960                               | 2.17                                      | 3.08                                |
| 4.32                          | 2.60                                | 3.50                                      | 5.56                                |
| 6.29                          | 5.26                                | 4.35                                      | 7.67                                |
| 9.51                          | 7.66                                | 8.70                                      | 13.9                                |
| 12.1                          | 9.85                                | 15.2                                      | 23.0                                |
| 14.7                          | 11.3                                | -                                         | -                                   |
| 21.7                          | 15.8                                | -                                         | -                                   |
| <b>Morpholine</b>             |                                     | <b>1-Formylpiperazine</b>                 |                                     |
| $10^3[\text{Amine}]/\text{M}$ | $10^3k_{\text{obsd}}/\text{s}^{-1}$ | $10^3[\text{Amine}]/\text{M}$             | $10^3k_{\text{obsd}}/\text{s}^{-1}$ |
| 0.870                         | 0.413                               | 0.870                                     | 0.129                               |
| 2.20                          | 1.13                                | 2.17                                      | 0.335                               |
| 3.50                          | 1.87                                | 3.48                                      | 0.524                               |
| 8.70                          | 4.46                                | 4.35                                      | 0.657                               |
| 15.2                          | 8.32                                | 8.70                                      | 1.78                                |
| 22.0                          | 11.9                                | 13.0                                      | 3.29                                |
|                               |                                     | 15.2                                      | 4.53                                |
|                               |                                     | 21.7                                      | 7.73                                |

Pseudo first-order rate constants were reproducible within a  $\pm 5\%$

**Table S3:** Pseudo-first-order rate constant ( $k_{\text{obsd}}$ ), second-order rate constant ( $k_N^T$ ), rate constant for nucleophilic attack at P ( $k_N^P$ ) and rate constant for nucleophilic attack at aromatic C-1 ( $k_N^{Ar}$ ) for the reaction of piperidine to 1 in [Bmim]BF<sub>4</sub> at the 20-40°C range.

| Temperature 20°C±0.1          |                                     | Temperature 25°C±0.1          |                                     | Temperature 30°C±0.1       |                                     |
|-------------------------------|-------------------------------------|-------------------------------|-------------------------------------|----------------------------|-------------------------------------|
| $10^3[\text{Amine}]/\text{M}$ | $10^2k_{\text{obsd}}/\text{s}^{-1}$ | $10^3[\text{Amine}]/\text{M}$ | $10^2k_{\text{obsd}}/\text{s}^{-1}$ | $10^3[\text{Amine}],$<br>M | $10^2k_{\text{obsd}}/\text{s}^{-1}$ |
| 6.92                          | 1.13                                | 4.32                          | 0.192                               | 6.92                       | 1.44                                |
| 9.51                          | 1.95                                | 6.92                          | 1.03                                | 9.51                       | 2.64                                |
| 14.7                          | 4.30                                | 9.51                          | 2.09                                | 12.1                       | 3.90                                |
| 17.3                          | 5.15                                | 12.1                          | 3.39                                | 14.7                       | 5.86                                |
| 21.7                          | 6.54                                | 14.7                          | 4.82                                | 17.3                       | 6.50                                |
| -                             | -                                   | 17.3                          | 5.95                                | 21.7                       | 7.85                                |

| Temperature 35°C±0.1          |                                     | Temperature 40 °C±0.1         |                                     |
|-------------------------------|-------------------------------------|-------------------------------|-------------------------------------|
| $10^3[\text{Amine}]/\text{M}$ | $10^2k_{\text{obsd}}/\text{s}^{-1}$ | $10^3[\text{Amine}]/\text{M}$ | $10^2k_{\text{obsd}}/\text{s}^{-1}$ |
| 6.92                          | 1.61                                | 6.92                          | 1.74                                |
| 9.51                          | 3.11                                | 9.51                          | 3.65                                |
| 12.1                          | 4.80                                | 12.1                          | 5.45                                |
| 14.7                          | 6.52                                | 14.7                          | 6.60                                |
| 17.3                          | 7.71                                | 17.3                          | 9.20                                |
| 21.7                          | 9.02                                | 21.7                          | 10.8                                |

| T°±0.1 | $k_N^T / \text{M}^{-1}\text{s}^{-1}$ | $k_N^P / \text{M}^{-1}\text{s}^{-1}$ | $k_N^{Ar} / \text{M}^{-1}\text{s}^{-1}$ |
|--------|--------------------------------------|--------------------------------------|-----------------------------------------|
| 20     | 3.77                                 | 0.75                                 | 3.02                                    |
| 25     | 4.56                                 | 0.91                                 | 3.65                                    |
| 30     | 4.50                                 | 0.90                                 | 3.60                                    |
| 35     | 5.18                                 | 1.04                                 | 4.14                                    |
| 40     | 6.26                                 | 1.25                                 | 5.01                                    |

**Table S4:** Pseudo-first-order rate constant ( $k_{\text{obsd}}$ ), second-order rate constant ( $k_N^T$ ), rate constant for nucleophilic attack at P ( $k_N^P$ ) and rate constant for nucleophilic attack at aromatic C-1 ( $k_N^{Ar}$ ) for the reaction of piperidine to **1** in [Bmim]DCA at the 20-40°C range.

| Temperature 20°C±0.1          |                                     | Temperature 25°C±0.1          |                                     | Temperature 30°C±0.1           |                                     |
|-------------------------------|-------------------------------------|-------------------------------|-------------------------------------|--------------------------------|-------------------------------------|
| $10^3[\text{Amine}]/\text{M}$ | $10^2k_{\text{obsd}}/\text{s}^{-1}$ | $10^3[\text{Amine}]/\text{M}$ | $10^2k_{\text{obsd}}/\text{s}^{-1}$ | $10^3[\text{Amine}], \text{M}$ | $10^2k_{\text{obsd}}/\text{s}^{-1}$ |
| 2.17                          | 1.25                                | 1.73                          | 9.64                                | 2.17                           | 1.37                                |
| 4.35                          | 3.17                                | 4.32                          | 26.0                                | 3.48                           | 2.31                                |
| 8.70                          | 6.88                                | 6.92                          | 52.6                                | 8.70                           | 7.71                                |
| 15.0                          | 10.8                                | 9.51                          | 76.6                                | 15.0                           | 12.2                                |
| 21.7                          | 14.8                                | 12.1                          | 98.5                                | 21.7                           | 18.0                                |
| -                             | -                                   | 14.7                          | 113                                 | -                              | -                                   |
| -                             | -                                   | 21.7                          | 158                                 | -                              | -                                   |

| Temperature 35°C±0.1          |                                     | Temperature 40 °C±0.1         |                                     |
|-------------------------------|-------------------------------------|-------------------------------|-------------------------------------|
| $10^3[\text{Amine}]/\text{M}$ | $10^2k_{\text{obsd}}/\text{s}^{-1}$ | $10^3[\text{Amine}]/\text{M}$ | $10^2k_{\text{obsd}}/\text{s}^{-1}$ |
| 2.17                          | 19.4                                | 0.870                         | 0.254                               |
| 3.48                          | 3.41                                | 1.52                          | 0.866                               |
| 8.70                          | 9.42                                | 2.17                          | 1.14                                |
| 15.0                          | 15.3                                | 3.48                          | 2.49                                |
| 21.7                          | 18.8                                | 4.35                          | 3.33                                |
| -                             | -                                   | 8.70                          | 8.31                                |

| $T^\circ \pm 0.1$ | $k_N^P / \text{M}^{-1}\text{s}^{-1}$ |
|-------------------|--------------------------------------|
| 20                | 6.89                                 |
| 25                | 7.62                                 |
| 30                | 8.50                                 |
| 35                | 8.87                                 |
| 40                | 10.4                                 |

**Table S5:** Pseudo-first-order rate constant ( $k_{\text{obsd}}$ ), second-order rate constant ( $k_N^T$ ), rate constant for nucleophilic attack at P ( $k_N^P$ ) and rate constant for nucleophilic attack at aromatic C-1 ( $k_N^{Ar}$ ) for the reaction of piperidine to **1** in aqueous media at the 20-40°C range.

| Temperature 20°C±0.1          |                                     | Temperature 25°C±0.1          |                                     | Temperature 30°C±0.1          |                                     |
|-------------------------------|-------------------------------------|-------------------------------|-------------------------------------|-------------------------------|-------------------------------------|
| $10^4[\text{Amine}]/\text{M}$ | $10^4k_{\text{obsd}}/\text{s}^{-1}$ | $10^4[\text{Amine}]/\text{M}$ | $10^4k_{\text{obsd}}/\text{s}^{-1}$ | $10^4[\text{Amine}]/\text{M}$ | $10^4k_{\text{obsd}}/\text{s}^{-1}$ |
| 2.50                          | 1.67                                | 2.50                          | 2.26                                | 2.50                          | 2.76                                |
| 6.00                          | 3.40                                | 6.00                          | 3.95                                | 6.00                          | 5.16                                |
| 10.0                          | 5.60                                | 10.0                          | 7.07                                | 10.0                          | 8.77                                |
| 14.0                          | 6.12                                | 14.0                          | 9.12                                | 14.0                          | 14.3                                |
| 17.5                          | 8.68                                | 17.5                          | 12.3                                | 17.5                          | 15.8                                |
| 20.0                          | 11.7                                | 20.0                          | 17.2                                | 20.0                          | 24.7                                |

| Temperature 35°C±0.1          |                                     | Temperature 40 °C±0.1         |                                     |
|-------------------------------|-------------------------------------|-------------------------------|-------------------------------------|
| $10^4[\text{Amine}]/\text{M}$ | $10^4k_{\text{obsd}}/\text{s}^{-1}$ | $10^4[\text{Amine}]/\text{M}$ | $10^4k_{\text{obsd}}/\text{s}^{-1}$ |
| 2.50                          | 5.13                                | 2.50                          | 9.14                                |
| 6.00                          | 9.70                                | 6.00                          | 16.3                                |
| 10.0                          | 16.6                                | 10.0                          | 20.9                                |
| 14.0                          | 25.4                                | 14.0                          | 29.3                                |
| 17.5                          | 35.0                                | 17.5                          | 31.8                                |
| 20.0                          | 35.4                                | 20.0                          | 49.3                                |

| $T^\circ\pm 0.1$ | $k_N^T / \text{M}^{-1}\text{s}^{-1}$ | $k_N^{Ar} / \text{M}^{-1}\text{s}^{-1}$ | $k_N^P / \text{M}^{-1}\text{s}^{-1}$ |
|------------------|--------------------------------------|-----------------------------------------|--------------------------------------|
| 20               | 0.59                                 | 0.12                                    | 0.47                                 |
| 25               | 0.60                                 | 0.12                                    | 0.48                                 |
| 30               | 0.93                                 | 0.18                                    | 0.74                                 |
| 35               | 1.77                                 | 0.35                                    | 1.42                                 |
| 40               | 2.21                                 | 0.44                                    | 1.77                                 |

**Figure S1:**  $^{31}\text{P}$ -NMR spectrum for the reaction of **1** with the secondary alicyclic amines in  $[\text{Bmim}]\text{BF}_4$  at the  $25^\circ\text{C}\pm 0.1$

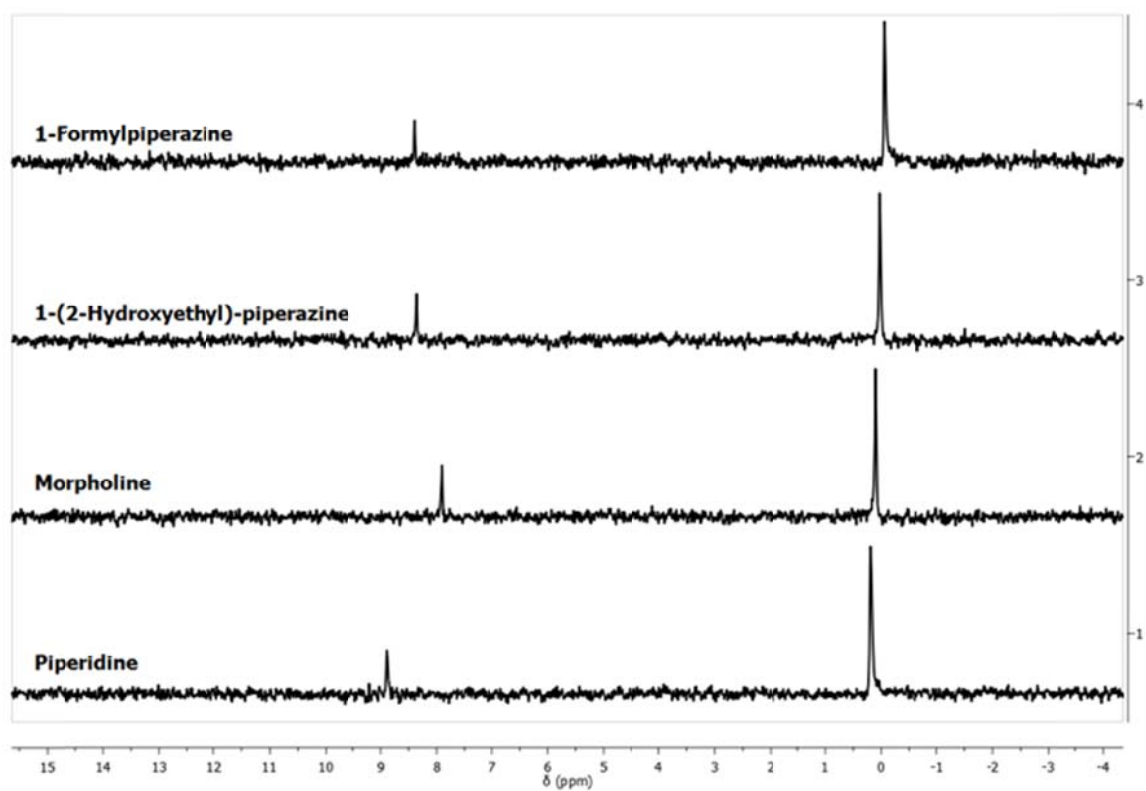



**Figure S2:** Plots  $k_{obs}^P$  against amine concentration for the reaction of **1** with a) piperidine. b) morpholine and c) 1-(2-hydroxyethyl)piperazine in [Bmim]BF<sub>4</sub> at the 25°C±0.1.

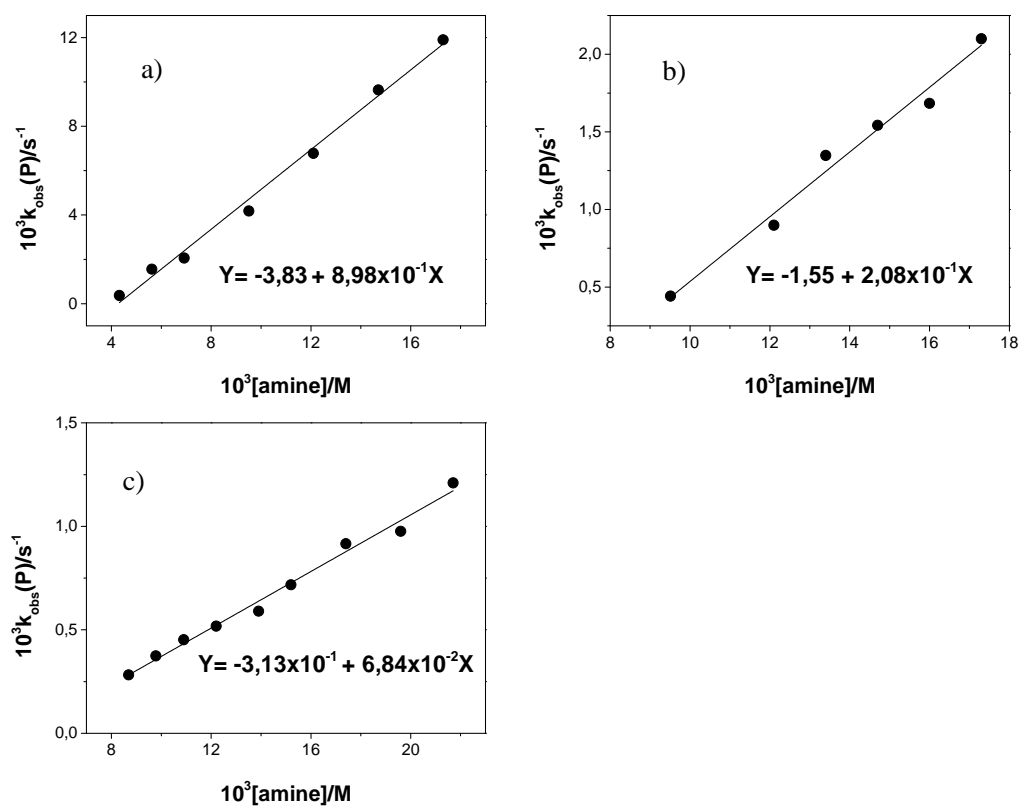

**Figure S3:** Plots  $k_{obs}^P$  against amine concentration for the reaction of **1** with a) piperidine, b) 1-(2-hydroxyethyl)piperazine and c) Morpholine in [Bmim]DCA at the  $25^\circ\text{C} \pm 0.1$

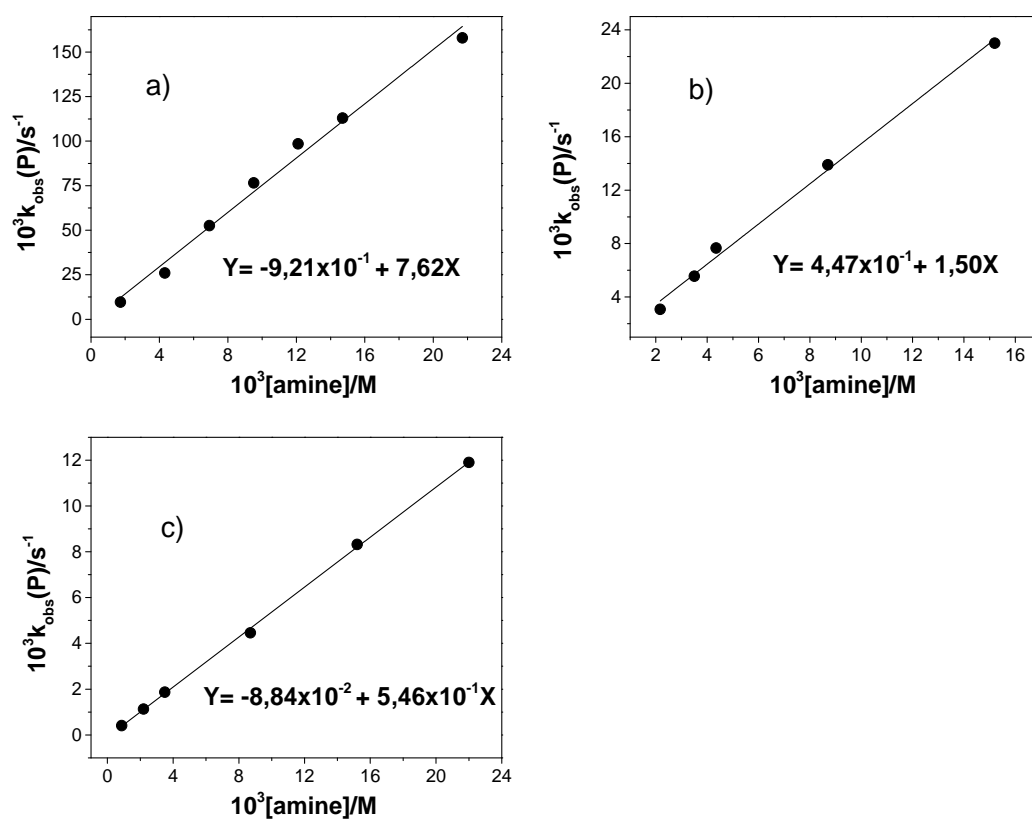

**Figure S4.** Linear plot of  $k_{\text{obsd}}$  vs.  $[\text{Formylpiperazine}]^2$  in a)  $[\text{Bmim}]\text{BF}_4$  and b)  $[\text{Bmim}]\text{DCA}$ .

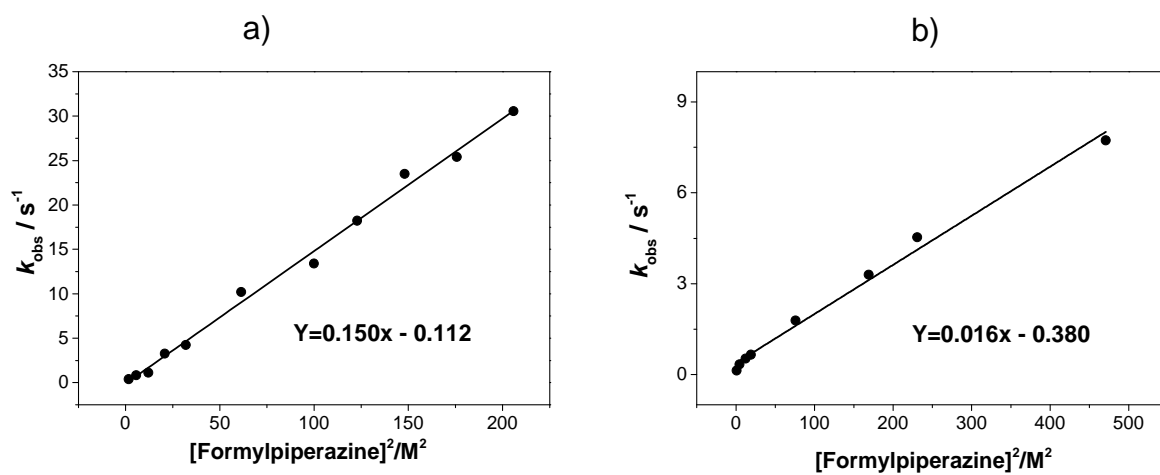

**Figure S5:** Double  $\text{pK}_a$  plot between  $\text{pK}_a$  values of SA amines in  $[\text{Bmim}]\text{BF}_4$  and Water

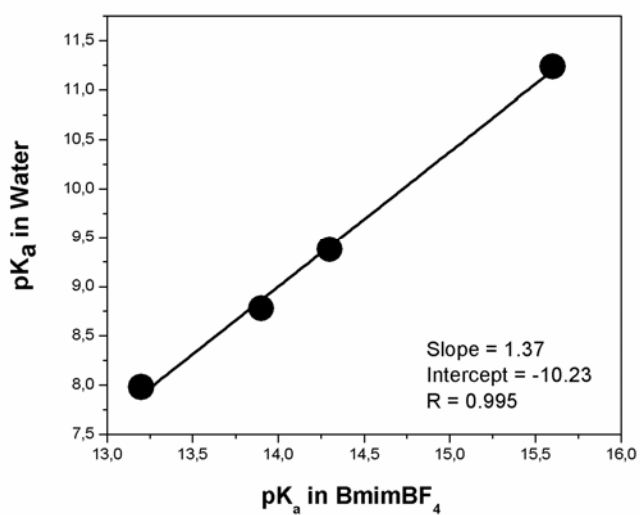

**Figure S6:** Arrhenius and Eyring plots for the reaction of **1** with piperidine in [Bmim]DCA.

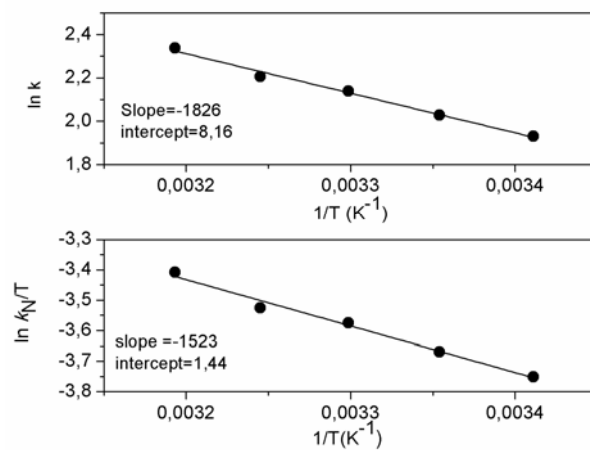

**Figure S7:** Arrhenius and Eyring plots for the reaction of **1** with piperidine in [Bmim]BF<sub>4</sub>

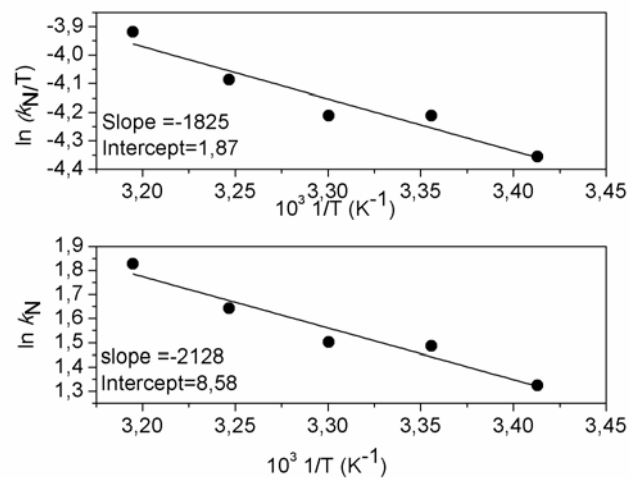

**Figure S8:** Arrhenius and Eyring plots for the reaction of **1** with piperidine in 44% w/w ethanol-water.

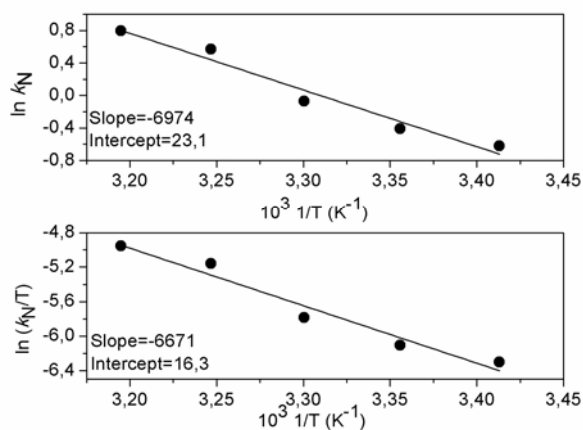

**Figure S9.** <sup>31</sup>P-NMR spectrum for the reaction of **1** with piperidine in [Bmim]BF<sub>4</sub> at the 20-40°C  $\pm 0.1$  range.

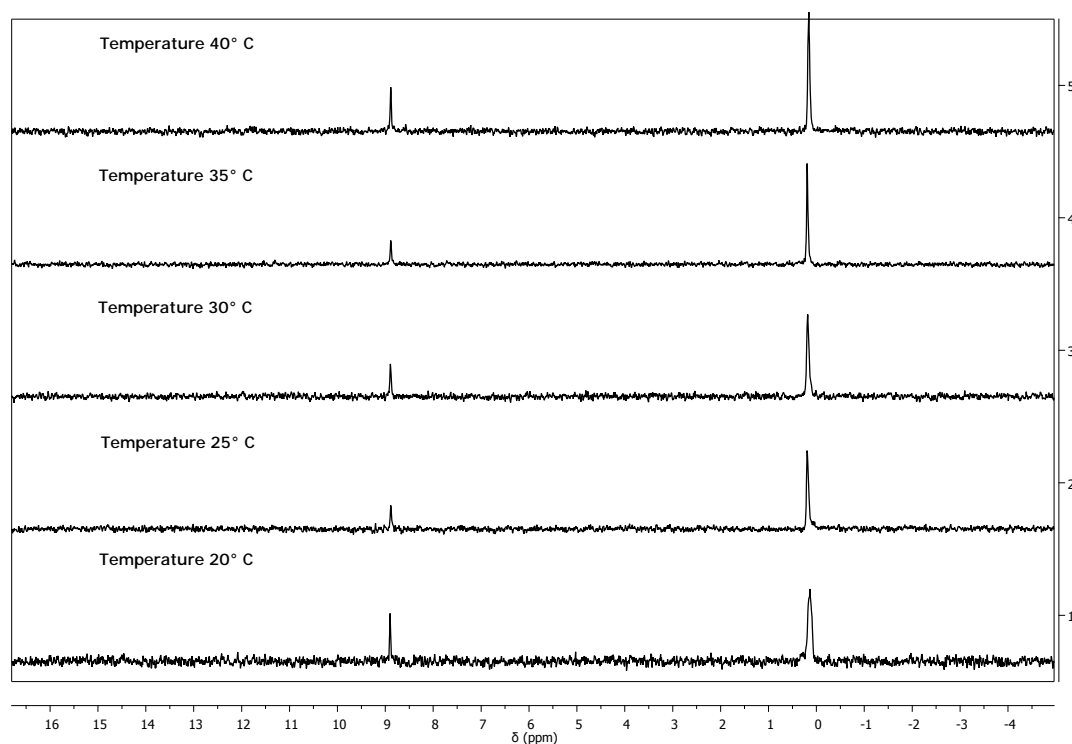

**Kinetic Details.** These were performed spectrophotometrically (diode array) in the range 300-500 nm, by following the appearance of products after at least four half-lives, by means of a Hewlett-Packard 8453 instrument. In a typical spectrophotometric measurement a quartz cuvette (light-path 0.2 cm) containing 500  $\mu\text{L}$  of ionic liquid was thermostated at 25°C during 10 minutes. The concentration of substrate 1 on the cell was  $1.8 \times 10^{-4}$  M, whilst the range concentrations of SA amines were  $9 \times 10^{-4}$  to  $2.2 \times 10^{-2}$  M. The spectra were recorded at different reaction times and pseudo-first-order rate coefficients ( $k_{\text{obsd}}$ ) were found for all reactions. Each sample was made in triplicate. The ( $k_{\text{obsd}}$ ) values were obtained by means of the kinetic software of the spectrophotometer, at the wavelength where the greatest absorbance change was observed. The nucleophilic rate constants  $k_N^T$  were obtained as the slope of linear plots of  $k_{\text{obsd}}$  vs. free nucleophile concentration. For the reactions in [Bmim]BF<sub>4</sub>, the separation of  $k_N^T$  into  $k_N^P$  (the nucleophilic rate constant at the phosphoryl center) and  $k_N^{Ar}$  (the nucleophilic rate constant at the C-1 aromatic carbon) was performed considering the quantitative product analysis (see below) and the fact that for parallel reactions  $k_N^T = k_N^{Ar} + k_N^P$ .

The activation parameters were determined at the same experimental conditions as above, at the 20-40°C-temperature range, by using Arrhenius and Eyring equations. In these experimental conditions the product analysis shows that in [Bmim]BF<sub>4</sub> the relative attack to the phosphoryl center remains constant within the temperature range (20%, see Figure S5 in Supporting Information).
